# Supplementary material for: Surface chemical modifications and surface reactivity of nanodiamonds hydrogenated by CVD plasma
Source: Royal Society of Chemistry journal article supplement (doi:10.1039/c1cp20109c), 2011-01-01
Supplement: c1cp20109c.pdf [file c1cp20109c.pdf]

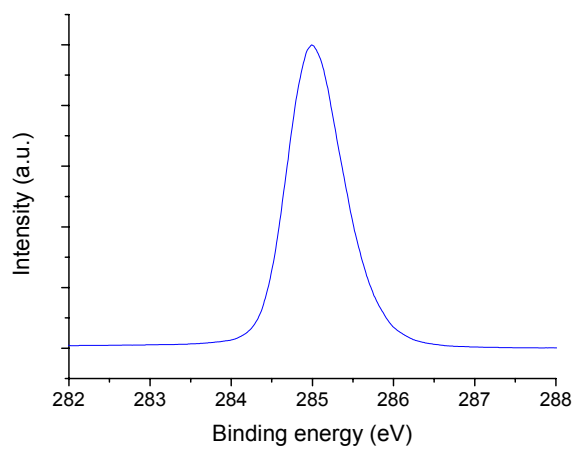

C 1s XPS spectrum of the CVD diamond reference

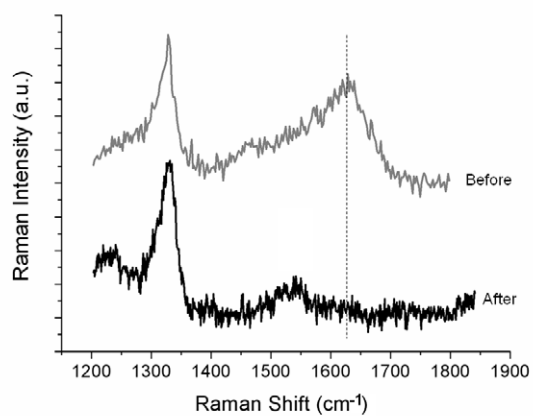

Detonation NDs Raman spectra before (top) and after (bottom) hydrogen plasma treatment.
